# Supplementary material for: Functional group induced excited state intramolecular proton transfer process in 4-amino-2-methylsulfanyl-pyrimidine-5-carboxylic acid ethyl ester: a combined spectroscopic and density functional theory study
Source: Royal Society of Chemistry journal article supplement (doi:10.1039/c3pp50010a), 2013-04-24
Supplement: c3pp50010a.pdf [file c3pp50010a.pdf]

## Supporting Information

**Functional group induced excited state intramolecular proton transfer process in 4-amino-2-methylsulfanyl-pyrimidine-5-carboxylic acid ethyl ester: A combined spectroscopic and Density Functional Theory study**

Sankar Jana, Sasanka Dalapati, Nikhil Guchhait\*

92, A.P.C. Road, Department of Chemistry, University of Calcutta, Kolkata-700009,  
India.

\*Corresponding author, E-mail: [nguchhait@yahoo.com](mailto:nguchhait@yahoo.com) (Nikhil Guchhait)

Tel: 91-33-23508386; Fax: 91-33-23519755

**Contents:**

- 1. Chemicals and solvent used**
- 2. Absorption spectra of AMPCE with increasing AcOH concentration**
- 3. Atomic charge on different atoms of AMPCE with different forms**
- 4. Different forms of ground and excited state energy optimized structures of AMPCE in vacuo**
- 5. The ground and excited state energy optimized structures of AMPCE with different forms in methanol solvent**
- 6. Ground and excited state optimized parameters of A, A<sup>\*</sup>, I, I<sup>\*</sup> forms of AMPCE molecule in vacuo and MeOH solvent**
- 7. Difference in parameter between A and I form in ground state and between A<sup>\*</sup> and I<sup>\*</sup> form in excited state**
- 8. Double y-axis plot for non-monotonic nature of PT process along PT coordinate**
- 9. Ground and excited state 3D potential energy surfaces of AMPCE in methanol**

## 1. Chemicals and solvent used

Spectroscopic grade of all solvents such as cyclohexane (CY), methylcyclohexane (MCH), n-heptane (n-hept), n-hexane (n-hex), tetrahydrofuran (THF), 1,4-dioxane (DOX), chloroform (CHCl<sub>3</sub>), carbontetrachloride (CCl<sub>4</sub>), 1,2-dichloromethane (DCM), N,N-dimethylformamide (DMF), dimethylsulphoxide (DMSO), methanol (MeOH), isopropanol (<sup>i</sup>PrOH), butanol (BuOH), and acetonitrile (ACN) were purchased from Spectrochem and were used after proper distillation as required. Ethanol (EtOH), sulphuric acid (H<sub>2</sub>SO<sub>4</sub>), acetic acid (AcOH) and sodium hydroxide from E. Merck were used as received. Triple distilled water was used for the preparation of all aqueous solutions. AMPCE is totally soluble in almost all the solvents used except non polar (n-hex, n-hept, MCH, CY and CCl<sub>4</sub>) and water solvents in which it is partially soluble. Therefore, 5% ethanol solution has been used for those solvents in which AMPCE is partially soluble.

## 2. Absorption spectra of AMPCE with increasing AcOH concentration in n-hex solvent

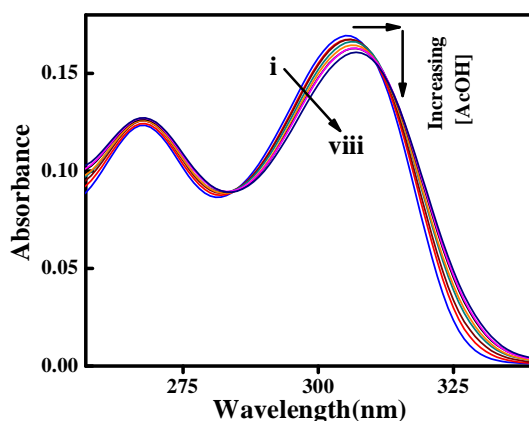

**Fig. S1.** Changes of absorption profile of AMPCE as a function of AcOH concentration in n-hex solvent (i→viii; 0, 0.1, 1.9, 4.2, 8.13, 16.83, 25.1, 35.4 mM AcOH).

3.

**Table S1: Atomic charge on different atoms of AMPCE with different forms involving in PT process in vacuo and MeOH solvent**

| Atom with numbering | Vacuo  |        |        |        | MeOH   |        |        |        |
|---------------------|--------|--------|--------|--------|--------|--------|--------|--------|
|                     | A      | A*     | I      | I*     | A      | A*     | I      | I*     |
| C <sub>1</sub>      | -0.123 | -0.293 | -0.106 | -0.231 | -0.122 | -0.266 | -0.091 | -0.18  |
| C <sub>2</sub>      | 1.312  | 1.408  | 1.785  | 1.721  | 1.342  | 1.449  | 1.809  | 1.781  |
| C <sub>3</sub>      | -0.169 | -0.185 | -0.195 | -0.159 | -0.162 | -0.189 | -0.180 | -0.153 |
| N <sub>4</sub>      | -0.015 | 0.077  | -0.029 | 0.002  | -0.068 | -0.008 | -0.087 | -0.046 |
| C <sub>5</sub>      | -0.198 | -0.099 | -0.173 | -0.152 | -0.162 | 0.072  | -0.133 | -0.106 |
| N <sub>6</sub>      | -0.016 | 0.014  | 0.025  | 0.001  | -0.069 | -0.051 | -0.056 | -0.089 |
| N <sub>7</sub>      | -0.453 | -0.448 | -0.665 | -0.708 | -0.475 | -0.473 | -0.728 | -0.785 |
| C <sub>8</sub>      | -0.736 | -0.735 | -1.223 | -1.102 | -0.710 | -0.735 | -1.201 | -1.116 |
| S <sub>10</sub>     | -0.103 | -0.345 | -0.100 | -0.101 | -0.132 | -0.457 | -0.137 | -0.129 |
| C <sub>11</sub>     | -0.661 | -0.578 | -0.668 | -0.664 | -0.666 | -0.576 | -0.673 | -0.671 |
| O <sub>12</sub>     | -0.046 | -0.048 | -0.042 | -0.016 | -0.057 | -0.065 | -0.032 | -0.016 |
| O <sub>13</sub>     | -0.313 | -0.299 | -0.254 | -0.231 | -0.355 | -0.346 | -0.245 | -0.226 |
| H <sub>24</sub>     | 0.299  | 0.298  | 0.438  | 0.424  | 0.311  | 0.308  | 0.441  | 0.424  |
| H <sub>25</sub>     | 0.284  | 0.286  | 0.257  | 0.247  | 0.313  | 0.316  | 0.267  | 0.254  |

#### 4. Ground and excited state energy optimized different forms of AMPCE in vacuo

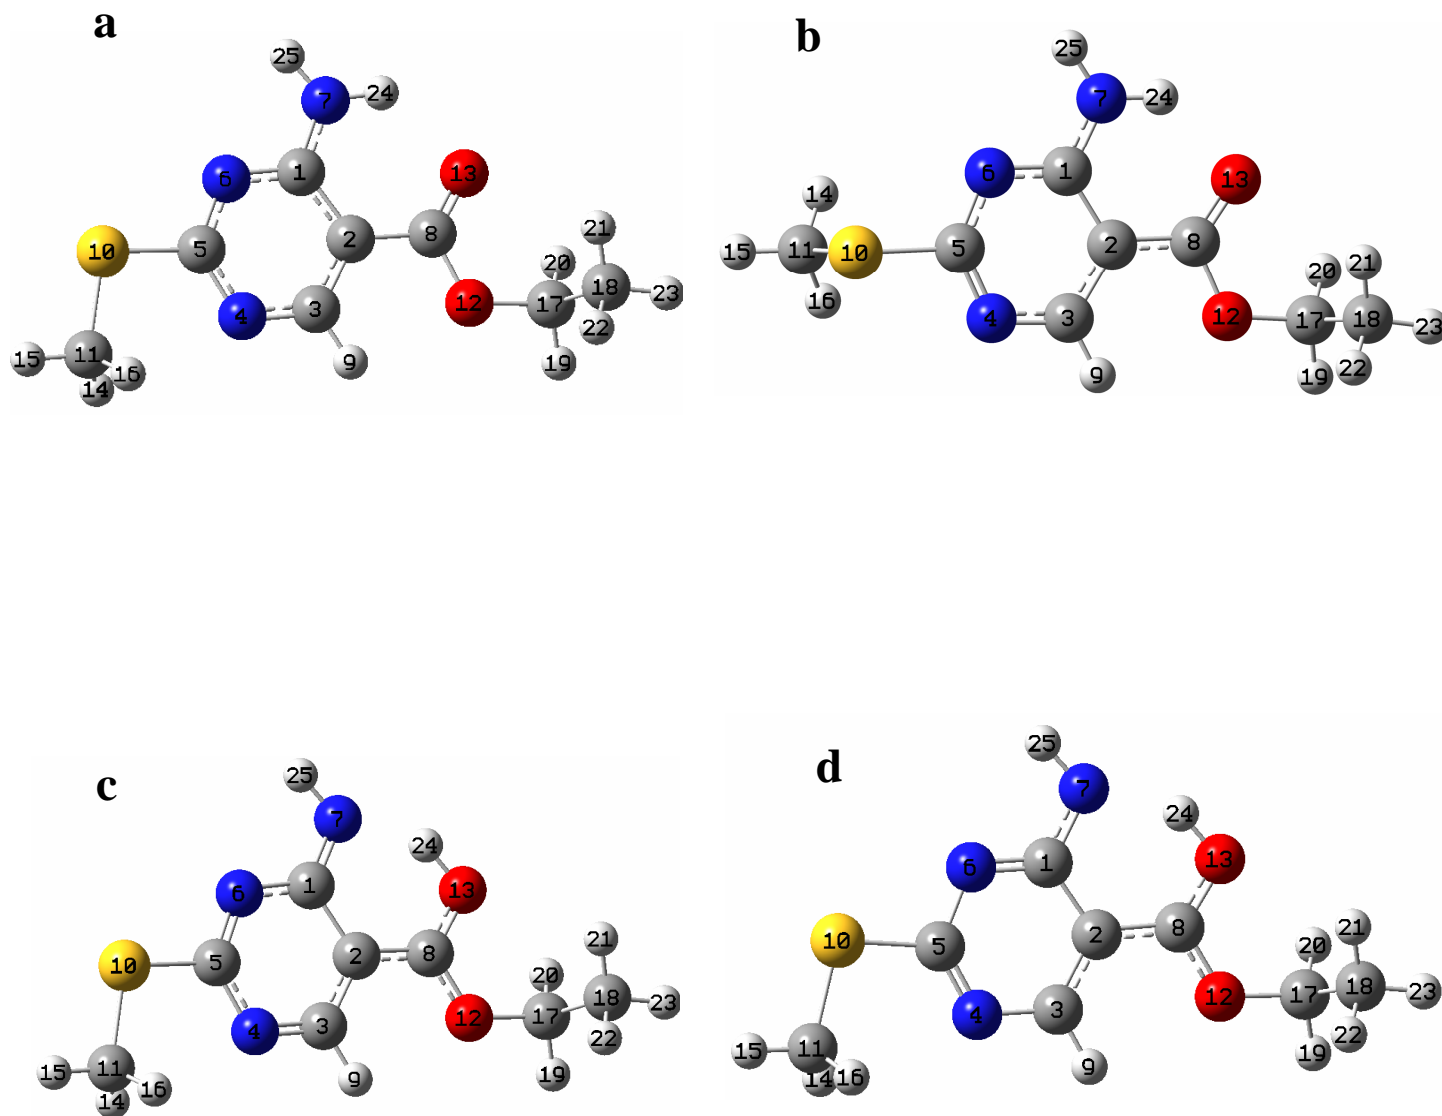

**Fig. S2:** Optimized structure of AMPCE with different forms in vacuo (a) Amine form in ground state [A] (b) Amine form in the excited state [A\*] (c) Imine form in ground state [I] (d) Imine form in the excited state [I\*].

## 5. Ground and excited state energy optimized different forms of AMPCE in methanol solvent

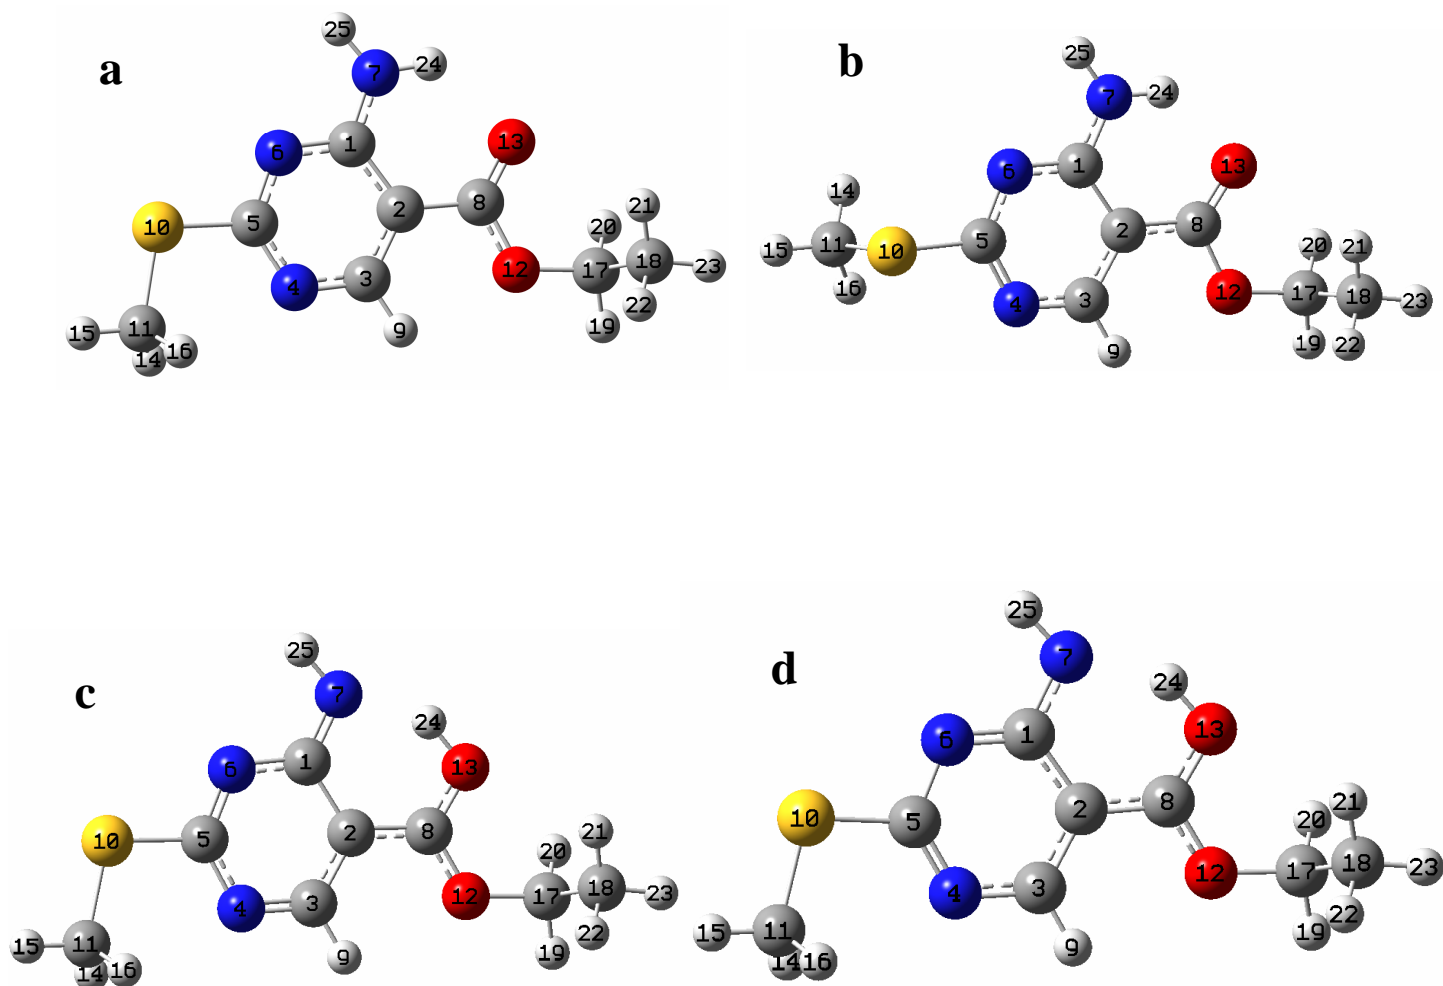

**Fig. S3:** Optimized structure of AMPCE with different forms in methanol solvent (a) Amine form in ground state [A] (b) Amine form in the excited state [A\*] (c) Imine form in ground state [I] (d) Imine form in the excited state [I\*].

6.

**Table S2: Ground and excited state optimized parameters of A, A\*, I, I\* forms of AMPCE molecule in vacuo and MeOH solvent**

| Parameter                                                         | Vacuo   |         |         |         | MeOH    |         |         |         |
|-------------------------------------------------------------------|---------|---------|---------|---------|---------|---------|---------|---------|
|                                                                   | A       | A*      | I       | I*      | A       | A*      | I       | I*      |
| N <sub>7</sub> -H <sub>24</sub>                                   | 1.010   | 1.010   | 1.710   | 1.710   | 1.010   | 1.010   | 1.710   | 1.710   |
| N <sub>7</sub> -O <sub>13</sub>                                   | 2.730   | 2.686   | 2.617   | 2.602   | 2.739   | 2.716   | 2.618   | 2.601   |
| O <sub>13</sub> -H <sub>24</sub>                                  | 1.991   | 1.897   | 1.020   | 1.005   | 2.003   | 1.942   | 1.017   | 1.002   |
| O <sub>13</sub> -C <sub>8</sub>                                   | 1.221   | 1.242   | 1.301   | 1.322   | 1.223   | 1.245   | 1.298   | 1.323   |
| N <sub>7</sub> -C <sub>1</sub>                                    | 1.344   | 1.346   | 1.300   | 1.364   | 1.340   | 1.347   | 1.303   | 1.359   |
| C <sub>2</sub> -C <sub>8</sub>                                    | 1.468   | 1.434   | 1.404   | 1.424   | 1.471   | 1.430   | 1.416   | 1.422   |
| C <sub>1</sub> -C <sub>2</sub>                                    | 1.430   | 1.448   | 1.466   | 1.447   | 1.431   | 1.451   | 1.462   | 1.446   |
| C <sub>8</sub> -O <sub>12</sub>                                   | 1.348   | 1.374   | 1.319   | 1.325   | 1.341   | 1.372   | 1.305   | 1.322   |
| N <sub>7</sub> -H <sub>25</sub>                                   | 1.006   | 1.005   | 1.015   | 1.019   | 1.007   | 1.007   | 1.016   | 1.020   |
| C <sub>5</sub> -S <sub>10</sub>                                   | 1.767   | 1.796   | 1.769   | 1.758   | 1.771   | 1.773   | 1.774   | 1.766   |
| C <sub>11</sub> -S <sub>10</sub>                                  | 1.824   | 1.809   | 1.825   | 1.818   | 1.823   | 1.812   | 1.824   | 1.819   |
| N <sub>7</sub> -H <sub>24</sub> -O <sub>13</sub>                  | 127.83  | 132.60  | 145.67  | 145.53  | 127.57  | 131.20  | 146.18  | 145.72  |
| H <sub>24</sub> -N <sub>7</sub> -C <sub>1</sub>                   | 119.40  | 117.64  | 101.14  | 103.61  | 119.51  | 118.35  | 100.69  | 103.48  |
| O <sub>13</sub> -C <sub>8</sub> -C <sub>2</sub>                   | 124.42  | 126.50  | 123.57  | 126.72  | 124.06  | 126.42  | 122.93  | 126.02  |
| N <sub>7</sub> -C <sub>1</sub> -C <sub>2</sub>                    | 122.62  | 120.62  | 120.18  | 117.30  | 122.82  | 120.73  | 120.47  | 117.20  |
| C <sub>8</sub> -C <sub>2</sub> -C <sub>1</sub>                    | 121.78  | 120.91  | 121.29  | 120.65  | 122.01  | 121.75  | 121.34  | 121.23  |
| H <sub>25</sub> -N <sub>7</sub> -H <sub>24</sub>                  | 122.46  | 123.17  | 146.83  | 146.89  | 121.43  | 122.18  | 147.18  | 146.39  |
| O <sub>13</sub> -C <sub>8</sub> -O <sub>12</sub>                  | 122.72  | 121.07  | 116.89  | 116.49  | 123.12  | 120.87  | 117.76  | 117.04  |
| C <sub>5</sub> -S <sub>10</sub> -C <sub>11</sub>                  | 102.07  | 102.72  | 102.97  | 100.99  | 102.94  | 104.08  | 103.70  | 102.01  |
| C <sub>4</sub> -C <sub>5</sub> -S <sub>10</sub>                   | 118.96  | 113.27  | 117.11  | 122.57  | 119.23  | 113.95  | 117.63  | 122.70  |
| H <sub>25</sub> -N <sub>7</sub> -C <sub>1</sub>                   | 118.13  | 118.89  | 112.02  | 109.48  | 119.04  | 119.45  | 112.12  | 110.11  |
| O <sub>12</sub> -C <sub>8</sub> -C <sub>2</sub>                   | 112.85  | 112.41  | 119.52  | 116.77  | 112.80  | 112.69  | 119.30  | 116.92  |
| H <sub>24</sub> -N <sub>7</sub> -C <sub>1</sub> -C <sub>2</sub>   | 0.28    | -2.49   | -0.09   | 0.25    | 0.06    | -0.01   | -0.25   | 0.15    |
| O <sub>13</sub> -C <sub>8</sub> -C <sub>2</sub> -C <sub>1</sub>   | -0.37   | 0.32    | 0.09    | 0.11    | -0.22   | 0.06    | -0.09   | -0.14   |
| N <sub>7</sub> -H <sub>24</sub> -C <sub>13</sub> -C <sub>8</sub>  | 0.14    | -1.24   | 0.43    | 0.26    | -0.02   | -0.76   | 0.24    | -0.12   |
| N <sub>7</sub> -C <sub>1</sub> -C <sub>2</sub> -C <sub>8</sub>    | 0.10    | 1.11    | 0.11    | -0.23   | 0.08    | -0.36   | 0.32    | -0.08   |
| H <sub>25</sub> -N <sub>7</sub> -C <sub>24</sub> -C <sub>1</sub>  | -179.57 | 173.84  | 179.57  | -178.87 | 179.95  | 179.34  | 179.32  | -179.10 |
| O <sub>13</sub> -C <sub>8</sub> -O <sub>12</sub> -C <sub>2</sub>  | -179.71 | -179.53 | -179.63 | -179.67 | -179.71 | -179.51 | -179.70 | -179.35 |
| C <sub>11</sub> -S <sub>10</sub> -C <sub>5</sub> -C <sub>4</sub>  | -0.30   | -89.35  | -0.31   | 0.08    | -0.23   | -93.77  | 0.09    | 0.08    |
| O <sub>13</sub> -C <sub>8</sub> -O <sub>12</sub> -C <sub>17</sub> | 0.40    | 1.10    | 1.49    | 0.45    | 0.72    | 1.54    | 0.64    | 2.88    |

7.

**Table S3: Difference in parameter between A and I form in ground state and between A\* and I\* form in excited state**

| Parameter                                        | vacuo |         | MeOH  |         |
|--------------------------------------------------|-------|---------|-------|---------|
|                                                  | A ~ I | A* ~ I* | A ~ I | A* ~ I* |
| N <sub>7</sub> -O <sub>13</sub>                  | 0.113 | 0.084   | 0.121 | 0.115   |
| O <sub>13</sub> -H <sub>24</sub>                 | 0.971 | 0.892   | 0.986 | 0.940   |
| O <sub>13</sub> -C <sub>8</sub>                  | 0.080 | 0.080   | 0.075 | 0.078   |
| N <sub>7</sub> -C <sub>1</sub>                   | 0.044 | 0.018   | 0.037 | 0.012   |
| C <sub>2</sub> -C <sub>8</sub>                   | 0.064 | 0.010   | 0.055 | 0.008   |
| C <sub>1</sub> -C <sub>2</sub>                   | 0.036 | 0.001   | 0.031 | 0.005   |
| N <sub>7</sub> -H <sub>24</sub> -O <sub>13</sub> | 18.84 | 12.93   | 18.61 | 14.52   |
| H <sub>24</sub> -N <sub>7</sub> -C <sub>1</sub>  | 18.26 | 14.03   | 18.82 | 14.87   |
| O <sub>13</sub> -C <sub>8</sub> -C <sub>2</sub>  | 0.85  | 0.22    | 1.13  | 0.40    |
| C <sub>8</sub> -C <sub>2</sub> -C <sub>1</sub>   | 0.49  | 0.26    | 0.67  | 0.52    |



### 8. Double y-axis plot for non-monotonic nature of PT process along PT coordinate

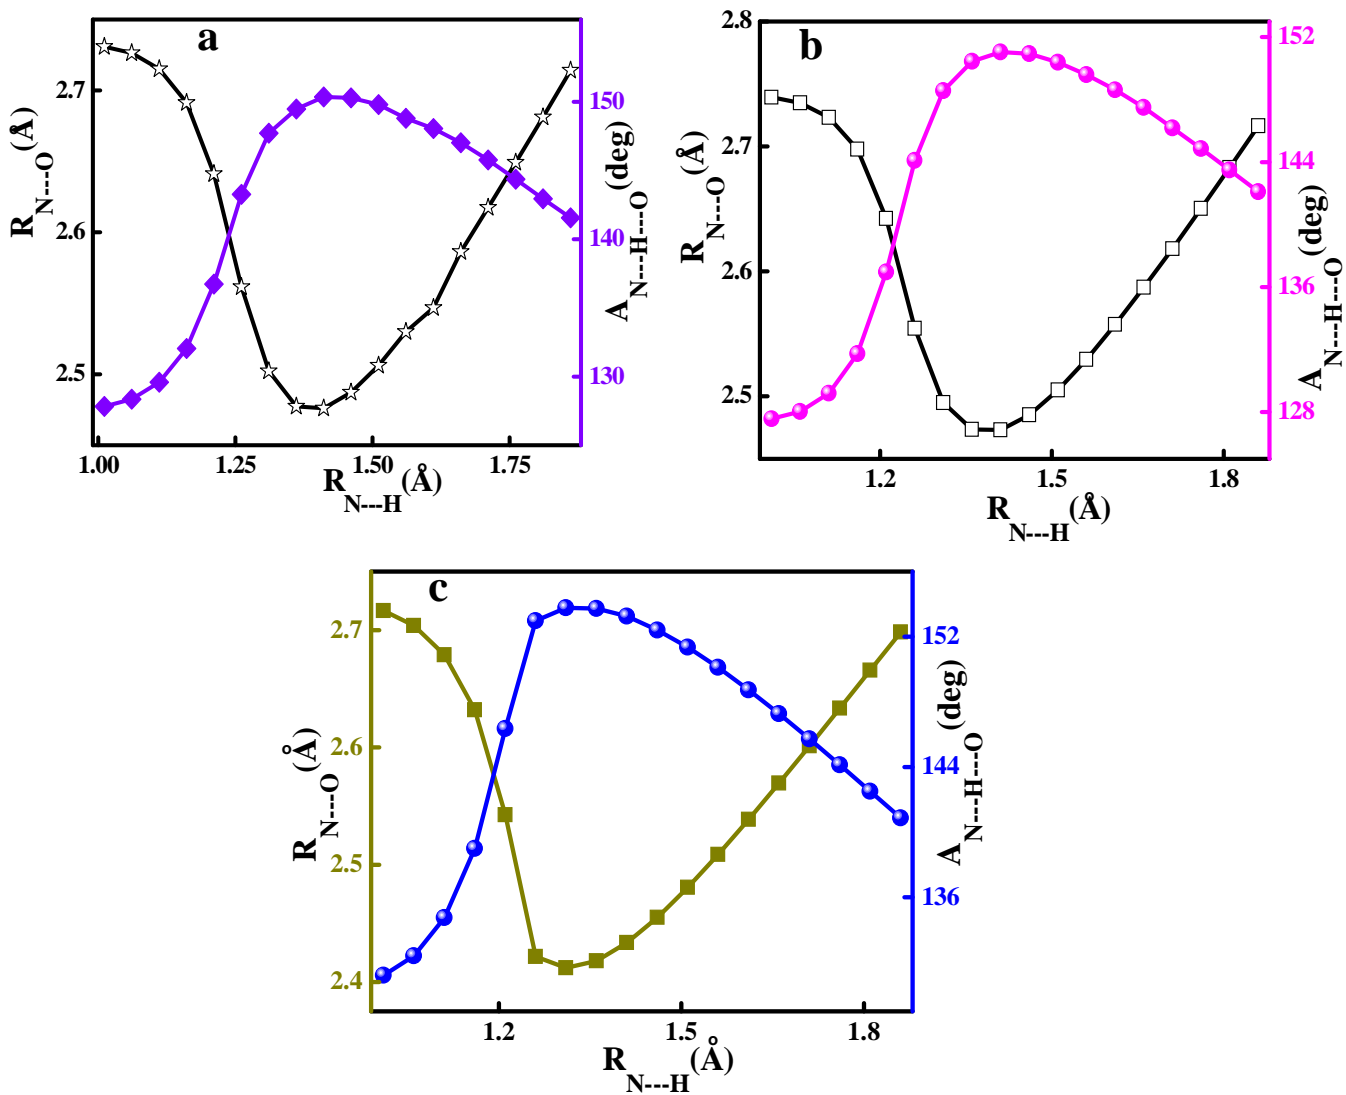

**Fig. S4.** Variation of N<sub>7</sub>---O<sub>13</sub> bond distance and N<sub>7</sub>---H<sub>24</sub>---O<sub>13</sub> angle against N<sub>7</sub>---H<sub>24</sub> bond distance (a) in the  $S_0$  state in vacuo (b)  $S_0$  state in methanol and (c)  $S_1$  state in methanol solvent.

## 9. Ground and excited state potential energy surfaces of AMPCE in methanol solvent

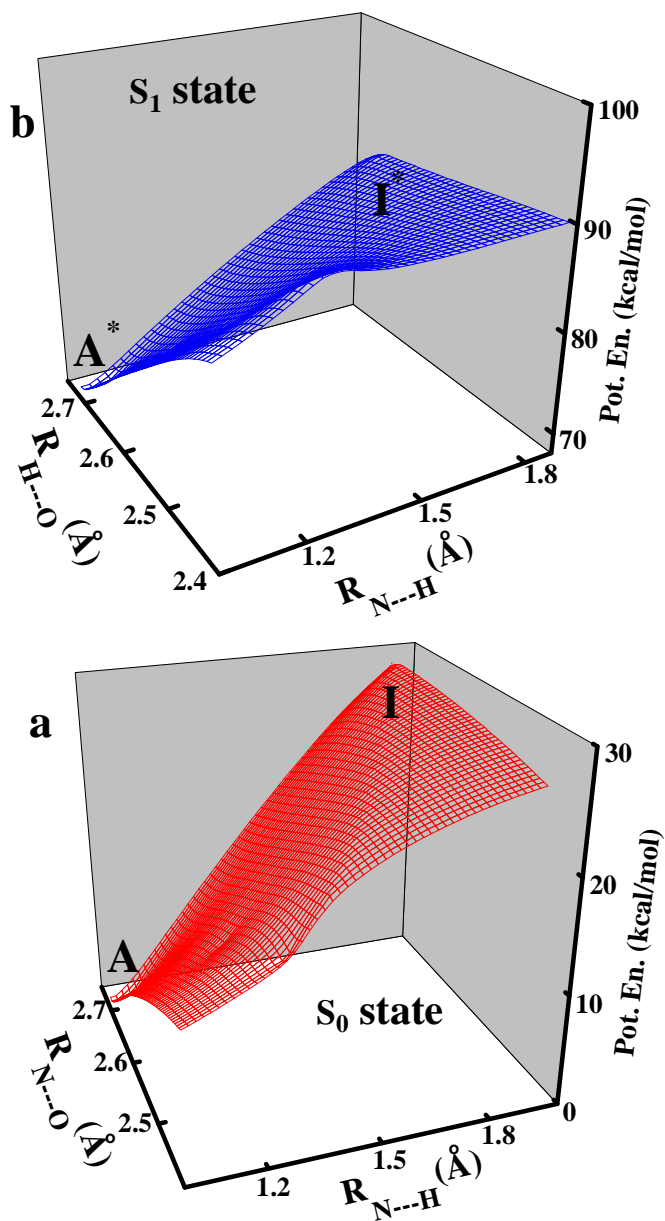

**Fig. S5.** 3D Potential energy surfaces for the (a) ground state and (b) first excited singlet state of AMPCE with variation of N<sub>7</sub>---H<sub>24</sub> and N<sub>7</sub>---O<sub>13</sub> bond distances in methanol solvent.
